# Supplementary material
Source: Springer Nature journal article supplement (https://www.springermedizin.de/resource/supplementary/13075_2009_2796_MOESM6_ESM.pdf/9692904)

$\Delta$ BMD (mg/cm<sup>2</sup>/year)

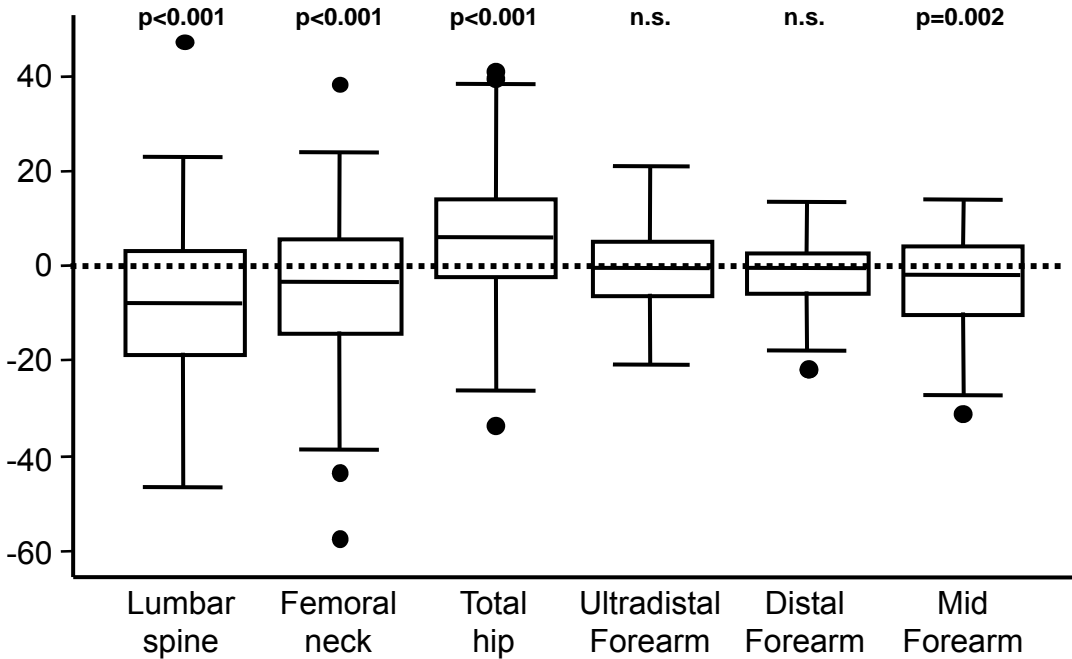

Supplement: MOESM6 [file 9692904]
